# Supplementary material for: ASIP Promoter Variants Predict the Sesame Coat Color in Shiba Inu Dogs
Source: MDPI journal article supplement (doi:10.3390/vetsci9050222), 2022-05-03
Supplement: s1 [file s1]

ATGTCTGGGCAGGGCCCCCAGAGAAGGCTGCTGGGCTCTCTCAATGGCACCTCCCCAGCCACCCCTCACTTCGAGC  
TGGCTGCCAACCAGACCGGGCCCCGGTGCCTGGAGGTGTCCATTCCCGACGGGCTGTTCCCTCAGCCTGGGGCTGG  
TGAGCGTTGTGGAAAATGTGCTGGTGGTGGCCGCCATTGCCAA[G>A]AACCGCAACCTGCACTC[G>A]CCCATGT  
ATTACTTCATCGGTTGCCTGGCTGTGTCCGACCTGCTGGTGAGCGTGAGCAATGTGCTGGAGACGGCCGTCATGCT  
GCTGGTGGCGGCAGGCGCCTTGGCTGCTCAGGCTGCTGTGGTGCAGCAGCTGGACGACATCATTGACGTGCTCAT  
CTGTGGTTCCATGGTATCCAGCCTCTGCTTCCTGGGCGCCATTGCCGTGGACCGCTACCTCTCCATCTTCTACGCGC  
TGCGATACCACAGCATCGTCACACTCCCGCGGGCGTGGCGGGCCATCTCCGCTATCTGGGTGGCTAGCGTCCTCTC  
CAGCACGCTCTTCATTGCCTACTACAATCACACGGCCGTCCTGCTTTGTCTTGTCAGCTTCTTTGTAGCCATGCTGGT  
GCTCATGGCAGTGCTGTACGTCCACATGCTTGCCCGCGCCTGCCAGCACGCCCCGAGGTATTGCCCCGGCTCCATAAG  
AGGCAGCACTTCATCCCCCAGGGCTTTGGCCTCAAGGGCGCTGCCACACTCACTATCCTGCTGGGCATTTTCTTTCT  
CTGCTGGGGCCCCTTCTTCTTGACCTCTCACTCGTGGTCCTCTGCCCTCAACACCCCATCTGTGGCTGCGTCTTTCA  
GAACTTCAACCTCTTCCTCACCTCATCATCTGCAACTCCATCATTGACCCCTTCATCTACGCCTCCGCAGCCAGGA  
GCTCCGAAAGACTCTCCAAGAGGTAGTGCTATGTTCTGGTGA
